# Supplementary material for: Selective depletion of microglial progranulin in mice is not sufficient to cause neuronal ceroid lipofuscinosis or neuroinflammation
Source: Springer Nature journal article supplement (doi:10.1186/s12974-017-1000-9), 2017-11-17

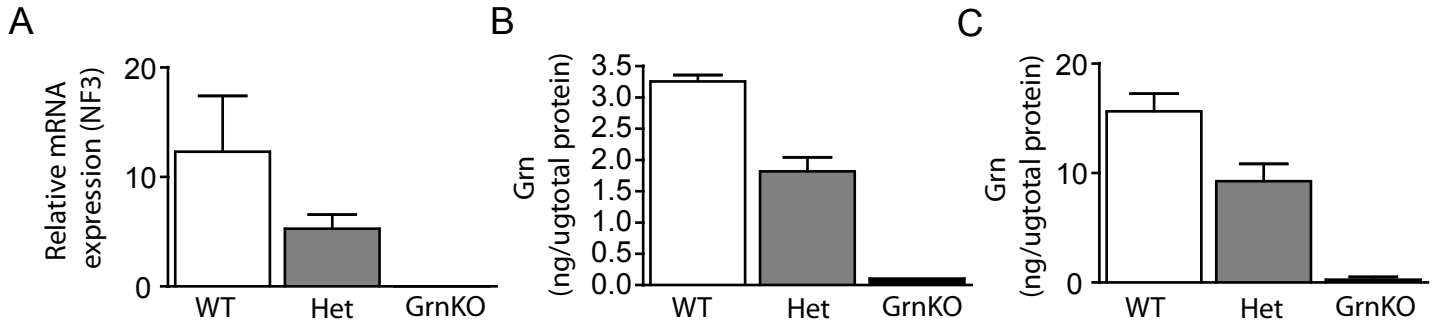

Supplement: MOESM1 [file 15233802]
